# Supplementary material for: Time-resolved in situ monitoring of photocatalytic reactions by probe electrospray ionization mass spectrometry
Source: Royal Society of Chemistry journal article supplement (doi:10.1039/d0an00305k), 2020-01-01
Supplement: d0an00305k1.pdf [file d0an00305k1.pdf]

Supporting information for

Time-resolved *in situ* Monitoring of Photocatalytic Reactions  
by Probe Electrospray Ionization Mass Spectrometry

Zhongbao Han, Xiaoyu Gu, Shirong Wang, Liyan Liu, Ying Wang, Zhen Zhao\*, Zhan Yu\*

*School of Chemistry and Chemical Engineering, Shenyang Normal University,*

*Shenyang 110034, Liaoning, China*

\* Corresponding author.

*E-mail address:* zhaozhen1586@163.com (Zhen Zhao), yuzhan@synu.edu.cn (Zhan Yu)

*TEL(O):* +86-24-86577124

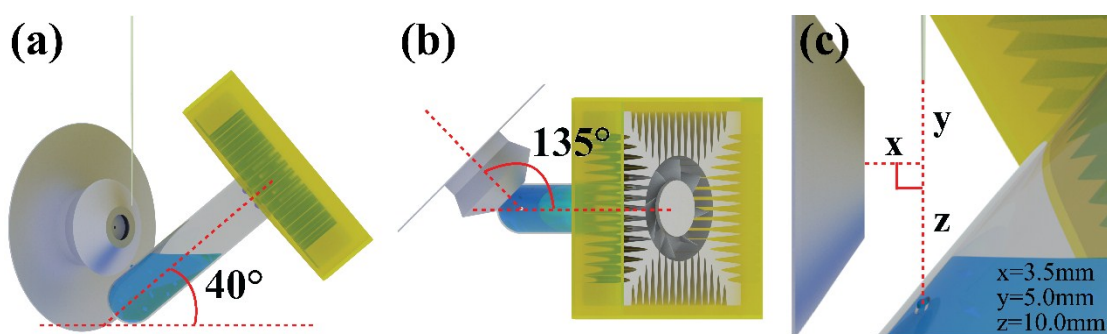

Figure S1 The front view (a) and the top view (b) of the reaction unit which was located in front of the ion sampling orifice of the mass spectrometer. The distance between the axis of the ion sampling orifice to the probe tip, to the sampling hole of the reaction unit and to the center of the ion sampling orifice were shown in (c).

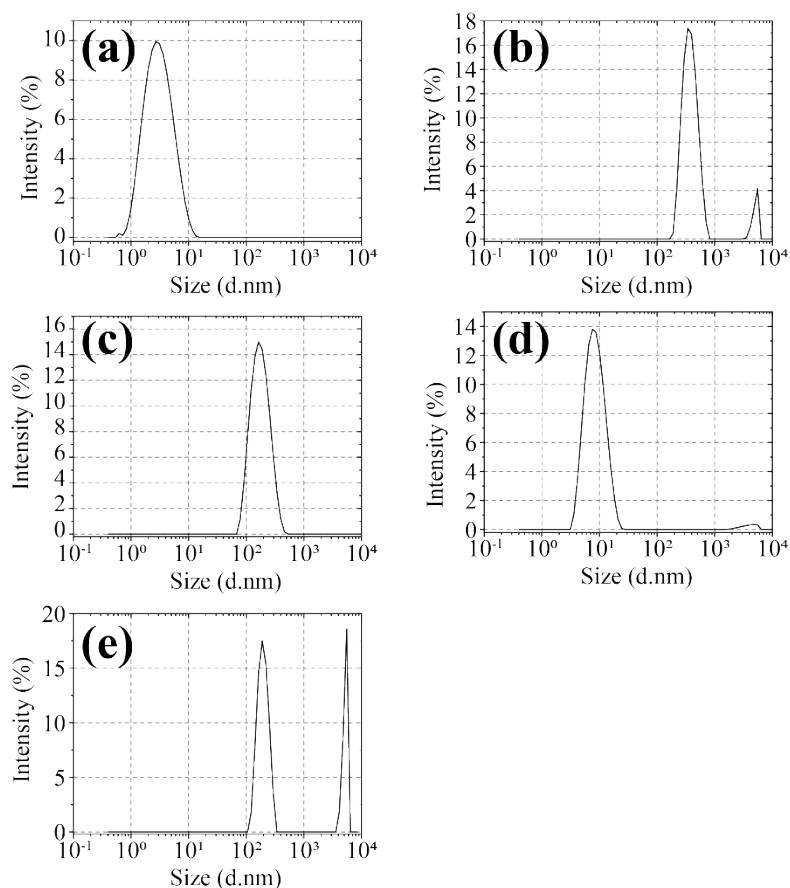

Figure S2 Intensity-based size distribution of (a)  $\text{TiO}_2$ , (b)  $\text{SnO}_2$ , (c)  $\text{WO}_3$ , (d)  $\text{SiC}$  and (e)  $\text{ZnS}$  at the concentration of 0.001 g/mL in ultrapure water, respectively. All data were measured by using a Nano-ZS90 Zetasizer instrument (Malvern Instruments, Worcestershire, UK) at a fixed detector angle of  $90^\circ$ .

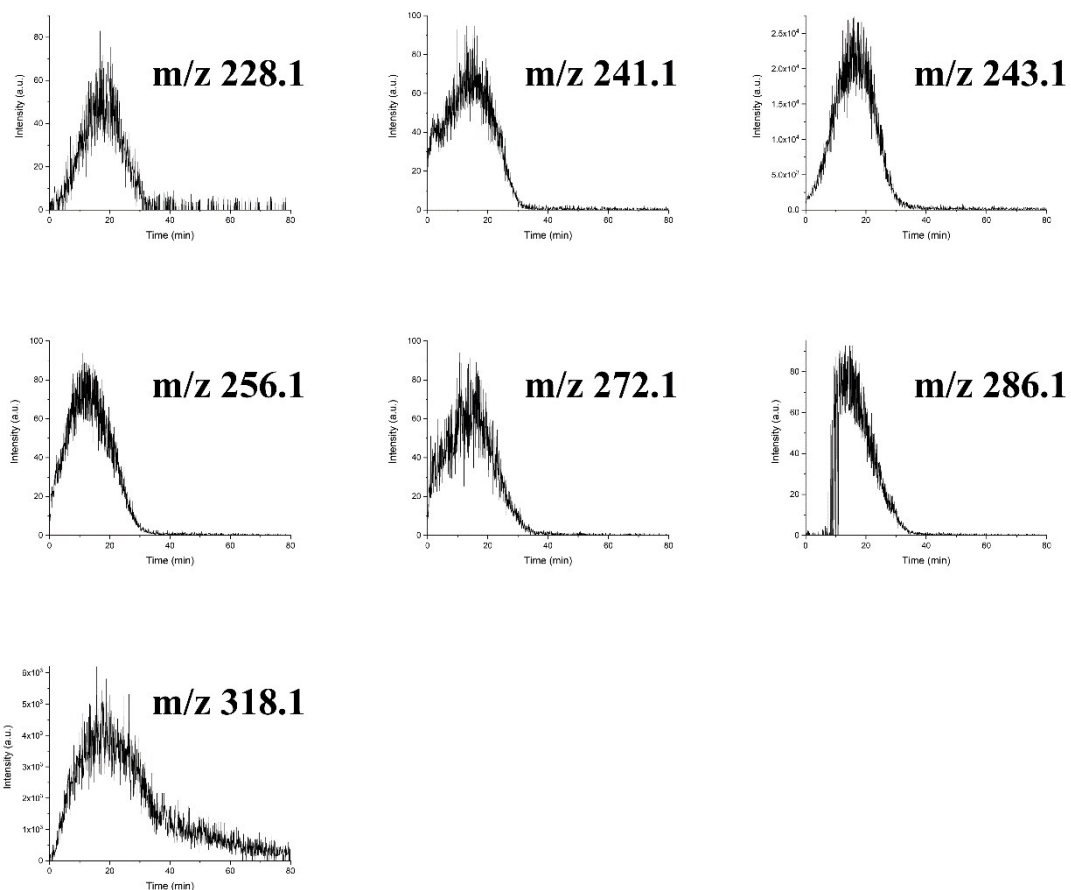

Figure S3 Extracted ion chromatograms of intermediate ions at  $m/z$  228.1, 241.1, 243.1, 256.1, 272.1, 286.1, and 318.1 from *in situ* monitoring of photocatalytic reaction of methylene blue by  $\text{TiO}_2$  under UV radiation.

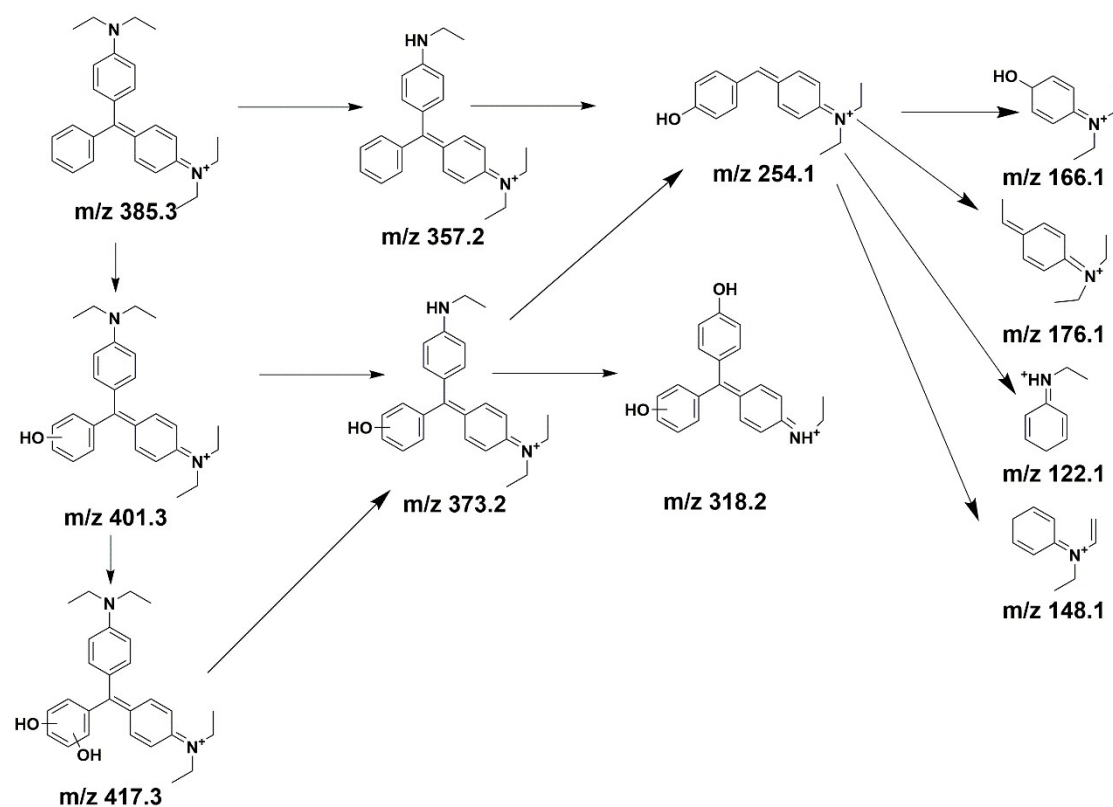

Scheme S1 Proposed degradation mechanism of brilliant green under UV irradiation in 45% ethanol  $\text{WO}_3$  dispersions followed by the identification of several intermediates by PESI-MS.

Table S1 Intermediates detected in the *in situ* monitoring of photocatalytic reaction of methylene blue by TiO<sub>2</sub>, WO<sub>3</sub>, ZnS, SiC and SnO<sub>2</sub> under UV radiation by PESI-MS.

| ID | Intermediate ion<br>(m/z) | Photocatalysts   |                 |     |     |                  |
|----|---------------------------|------------------|-----------------|-----|-----|------------------|
|    |                           | TiO <sub>2</sub> | WO <sub>3</sub> | ZnS | SiC | SnO <sub>2</sub> |
| 1  | 330.0                     |                  | +               |     |     |                  |
| 2  | 328.1                     | +                | +               |     |     | +                |
| 3  | 318.3                     |                  | +               |     | +   | +                |
| 4  | 318.1                     | +                |                 |     |     |                  |
| 5  | 316.1                     |                  | +               |     |     |                  |
| 6  | 301.0                     | +                | +               |     |     | +                |
| 7  | 300.1                     | +                | +               |     |     |                  |
| 8  | 286.1                     | +                | +               | +   | +   | +                |
| 9  | 277.0                     | +                | +               |     |     |                  |
| 10 | 274.0                     |                  |                 |     |     | +                |
| 11 | 273.0                     | +                | +               |     |     |                  |
| 12 | 272.1                     | +                | +               | +   | +   | +                |
| 13 | 271.1                     |                  |                 | +   |     |                  |
| 14 | 270.0                     | +                | +               |     |     |                  |
| 15 | 270.1                     |                  |                 | +   | +   |                  |
| 16 | 269.0                     |                  | +               | +   |     |                  |
| 17 | 265.0                     | +                |                 |     |     |                  |
| 18 | 263.0                     |                  | +               |     |     |                  |
| 19 | 261.0                     | +                | +               |     |     |                  |
| 20 | 260.0                     |                  | +               |     |     |                  |
| 21 | 259.0                     | +                | +               |     |     |                  |
| 22 | 257.0                     | +                | +               | +   | +   | +                |
| 23 | 256.1                     | +                | +               | +   |     | +                |
| 24 | 256.2                     |                  |                 |     |     | +                |
| 25 | 255.0                     |                  |                 | +   |     |                  |
| 26 | 254.0                     |                  | +               | +   | +   |                  |
| 27 | 251.0                     | +                |                 |     |     |                  |
| 28 | 249.0                     | +                | +               |     |     |                  |
| 29 | 247.0                     | +                | +               |     |     |                  |
| 30 | 246.7                     |                  |                 | +   |     |                  |
| 31 | 245.0                     |                  | +               |     |     |                  |
| 32 | 244.7                     |                  |                 | +   |     |                  |
| 33 | 243.1                     | +                | +               | +   | +   | +                |
| 34 | 243.0                     | +                | +               |     |     |                  |
| 35 | 242.7                     |                  |                 | +   |     |                  |
| 36 | 242.0                     |                  | +               |     |     |                  |
| 37 | 241.1                     | +                | +               | +   | +   | +                |
| 38 | 240.8                     |                  |                 | +   |     |                  |
| 39 | 239.0                     |                  |                 | +   |     |                  |
| 40 | 235.0                     | +                |                 |     |     |                  |

|    |       |   |   |   |   |   |
|----|-------|---|---|---|---|---|
| 41 | 233.0 | ਦ | ਦ |   |   |   |
| 42 | 231.0 | ਦ | ਦ |   |   | ਦ |
| 43 | 230.2 |   |   |   |   | ਦ |
| 44 | 229.0 | ਦ | ਦ |   |   |   |
| 45 | 228.1 | ਦ | ਦ | ਦ | ਦ | ਦ |
| 46 | 227.0 |   |   | ਦ | ਦ |   |
| 47 | 225.0 |   |   | ਦ |   |   |
| 48 | 221.0 | ਦ | ਦ |   |   |   |
| 49 | 219.0 | ਦ | ਦ |   |   |   |
| 50 | 217.0 | ਦ | ਦ |   |   |   |
| 51 | 215.0 | ਦ | ਦ |   |   |   |
| 52 | 214.0 |   | ਦ |   | ਦ |   |
| 53 | 209.0 | ਦ | ਦ |   |   |   |
| 54 | 208.8 |   |   | ਦ |   |   |
| 55 | 207.0 | ਦ | ਦ |   |   |   |
| 56 | 206.8 |   |   | ਦ |   |   |
| 57 | 205.0 | ਦ | ਦ |   |   |   |
| 58 | 204.8 |   |   | ਦ |   |   |
| 59 | 203.0 |   | ਦ |   |   |   |
| 60 | 202.7 |   |   | ਦ |   |   |
| 61 | 195.0 |   | ਦ |   |   |   |
| 62 | 191.0 | ਦ | ਦ |   |   |   |
| 63 | 188.8 |   |   | ਦ |   |   |
| 64 | 188.0 | ਦ | ਦ |   |   |   |
| 65 | 179.8 |   |   | ਦ |   |   |
| 66 | 177.8 |   |   | ਦ |   |   |
| 67 | 177.0 | ਦ | ਦ |   |   |   |
| 68 | 175.8 |   |   | ਦ |   |   |
| 69 | 166.8 |   |   | ਦ |   |   |
| 70 | 166.0 | ਦ | ਦ |   |   |   |
| 71 | 165.0 | ਦ | ਦ |   |   |   |
| 72 | 164.0 | ਦ | ਦ |   |   |   |
| 73 | 164.8 |   |   | ਦ |   |   |
| 74 | 163.0 | ਦ | ਦ |   |   |   |
| 75 | 162.8 |   |   | ਦ |   |   |
| 76 | 160.8 |   |   | ਦ |   |   |
| 77 | 152.0 | ਦ | ਦ |   |   |   |
| 78 | 150.0 |   | ਦ |   |   |   |
| 79 | 149.0 |   |   | ਦ |   |   |
| 80 | 133.0 | ਦ | ਦ |   |   |   |
| 81 | 122.0 |   | ਦ |   |   |   |
| 82 | 121.0 |   |   | ਦ |   |   |
| 83 | 120.0 | ਦ | ਦ |   |   |   |
| 84 | 119.0 | ਦ |   |   |   | ਦ |

|    |       |   |   |
|----|-------|---|---|
| 85 | 112.8 | ✓ |   |
| 86 | 112.0 |   | ✓ |
| 87 | 110.9 |   | ✓ |
| 88 | 109.9 |   | ✓ |
| 89 | 108.3 |   | ✓ |
| 90 | 107.9 |   | ✓ |

---

Note: The checkmark "✓" indicates the intermediate ion can be detected when the analyst was used for the *in situ* monitoring of photocatalytic degradation of methylene blue under UV radiation by PESI-MS.



Table S2 Intermediates detected in the *in situ* monitoring of photocatalytic reaction of brilliant green by TiO<sub>2</sub>, WO<sub>3</sub>, ZnS, SiC and SnO<sub>2</sub> under UV radiation by PESI-MS.

| ID | Intermediate ion<br>(m/z) | Photocatalysts   |                 |     |     |                  |
|----|---------------------------|------------------|-----------------|-----|-----|------------------|
|    |                           | TiO <sub>2</sub> | WO <sub>3</sub> | ZnS | SiC | SnO <sub>2</sub> |
| 1  | 417.3                     | +                | +               |     |     |                  |
| 2  | 401.3                     | +                | +               |     | +   |                  |
| 3  | 373.2                     | +                |                 |     |     |                  |
| 4  | 362.2                     |                  | +               |     |     |                  |
| 5  | 357.2                     |                  | +               | +   | +   | +                |
| 6  | 346.6                     |                  | +               |     |     |                  |
| 7  | 344.2                     |                  |                 | +   |     |                  |
| 8  | 338.3                     |                  |                 | +   |     |                  |
| 9  | 329.1                     |                  | +               |     |     |                  |
| 10 | 328.2                     | +                |                 |     |     |                  |
| 11 | 325.2                     | +                | +               |     |     |                  |
| 12 | 323.2                     |                  |                 |     |     | +                |
| 13 | 318.2                     |                  | +               | +   | +   | +                |
| 14 | 302.3                     |                  | +               |     |     |                  |
| 15 | 301.1                     | +                | +               |     |     | +                |
| 16 | 296.1                     |                  | +               |     |     |                  |
| 17 | 281.1                     |                  | +               |     |     |                  |
| 18 | 276.1                     | +                |                 |     |     |                  |
| 19 | 274.2                     |                  | +               | +   | +   | +                |
| 20 | 270.1                     | +                |                 |     |     |                  |
| 21 | 256.2                     |                  | +               | +   | +   |                  |
| 22 | 254.1                     | +                | +               | +   | +   | +                |
| 23 | 230.2                     |                  | +               |     | +   |                  |
| 24 | 226.1                     |                  |                 |     |     | +                |
| 25 | 225.1                     | +                | +               | +   |     | +                |
| 26 | 224.1                     |                  |                 | +   |     |                  |
| 27 | 210.0                     | +                | +               | +   |     | +                |
| 28 | 206.8                     |                  |                 | +   |     |                  |
| 29 | 204.8                     |                  |                 | +   |     |                  |
| 30 | 202.8                     |                  |                 | +   |     |                  |
| 31 | 176.1                     | +                | +               | +   | +   | +                |
| 32 | 166.1                     | +                | +               |     |     |                  |
| 33 | 160.8                     |                  |                 | +   |     |                  |
| 34 | 157.0                     | +                |                 |     |     |                  |
| 35 | 148.0                     | +                | +               | +   |     | +                |
| 36 | 137.0                     | +                | +               | +   |     |                  |
| 37 | 135.0                     |                  |                 |     | +   | +                |
| 38 | 134.0                     |                  | +               |     |     |                  |
| 39 | 124.1                     |                  |                 | +   |     |                  |
| 40 | 122.0                     | +                | +               | +   |     | +                |

|    |       |   |   |   |   |   |
|----|-------|---|---|---|---|---|
| 41 | 120.0 |   | ✓ | ✓ |   |   |
| 42 | 118.9 | ✓ |   |   |   |   |
| 43 | 109.0 | ✓ | ✓ | ✓ |   |   |
| 44 | 108.0 |   |   | ✓ |   |   |
| 45 | 105.0 | ✓ | ✓ | ✓ | ✓ | ✓ |

---

Note: The checkmark "✓" indicates the intermediate ion can be detected when the analyst was used for the *in situ* monitoring of photocatalytic degradation of brilliant green under UV radiation by PESI-MS.
